# Supplementary figures and images for: NCAPG Promotes Pulmonary Artery Smooth Muscle Cell Proliferation as a Promising Therapeutic Target of Idiopathic Pulmonary Hypertension: Bioinformatics Analysis and Experiment Verification
Source: MDPI journal article supplement (doi:10.3390/ijms231911762), 2022-10-04

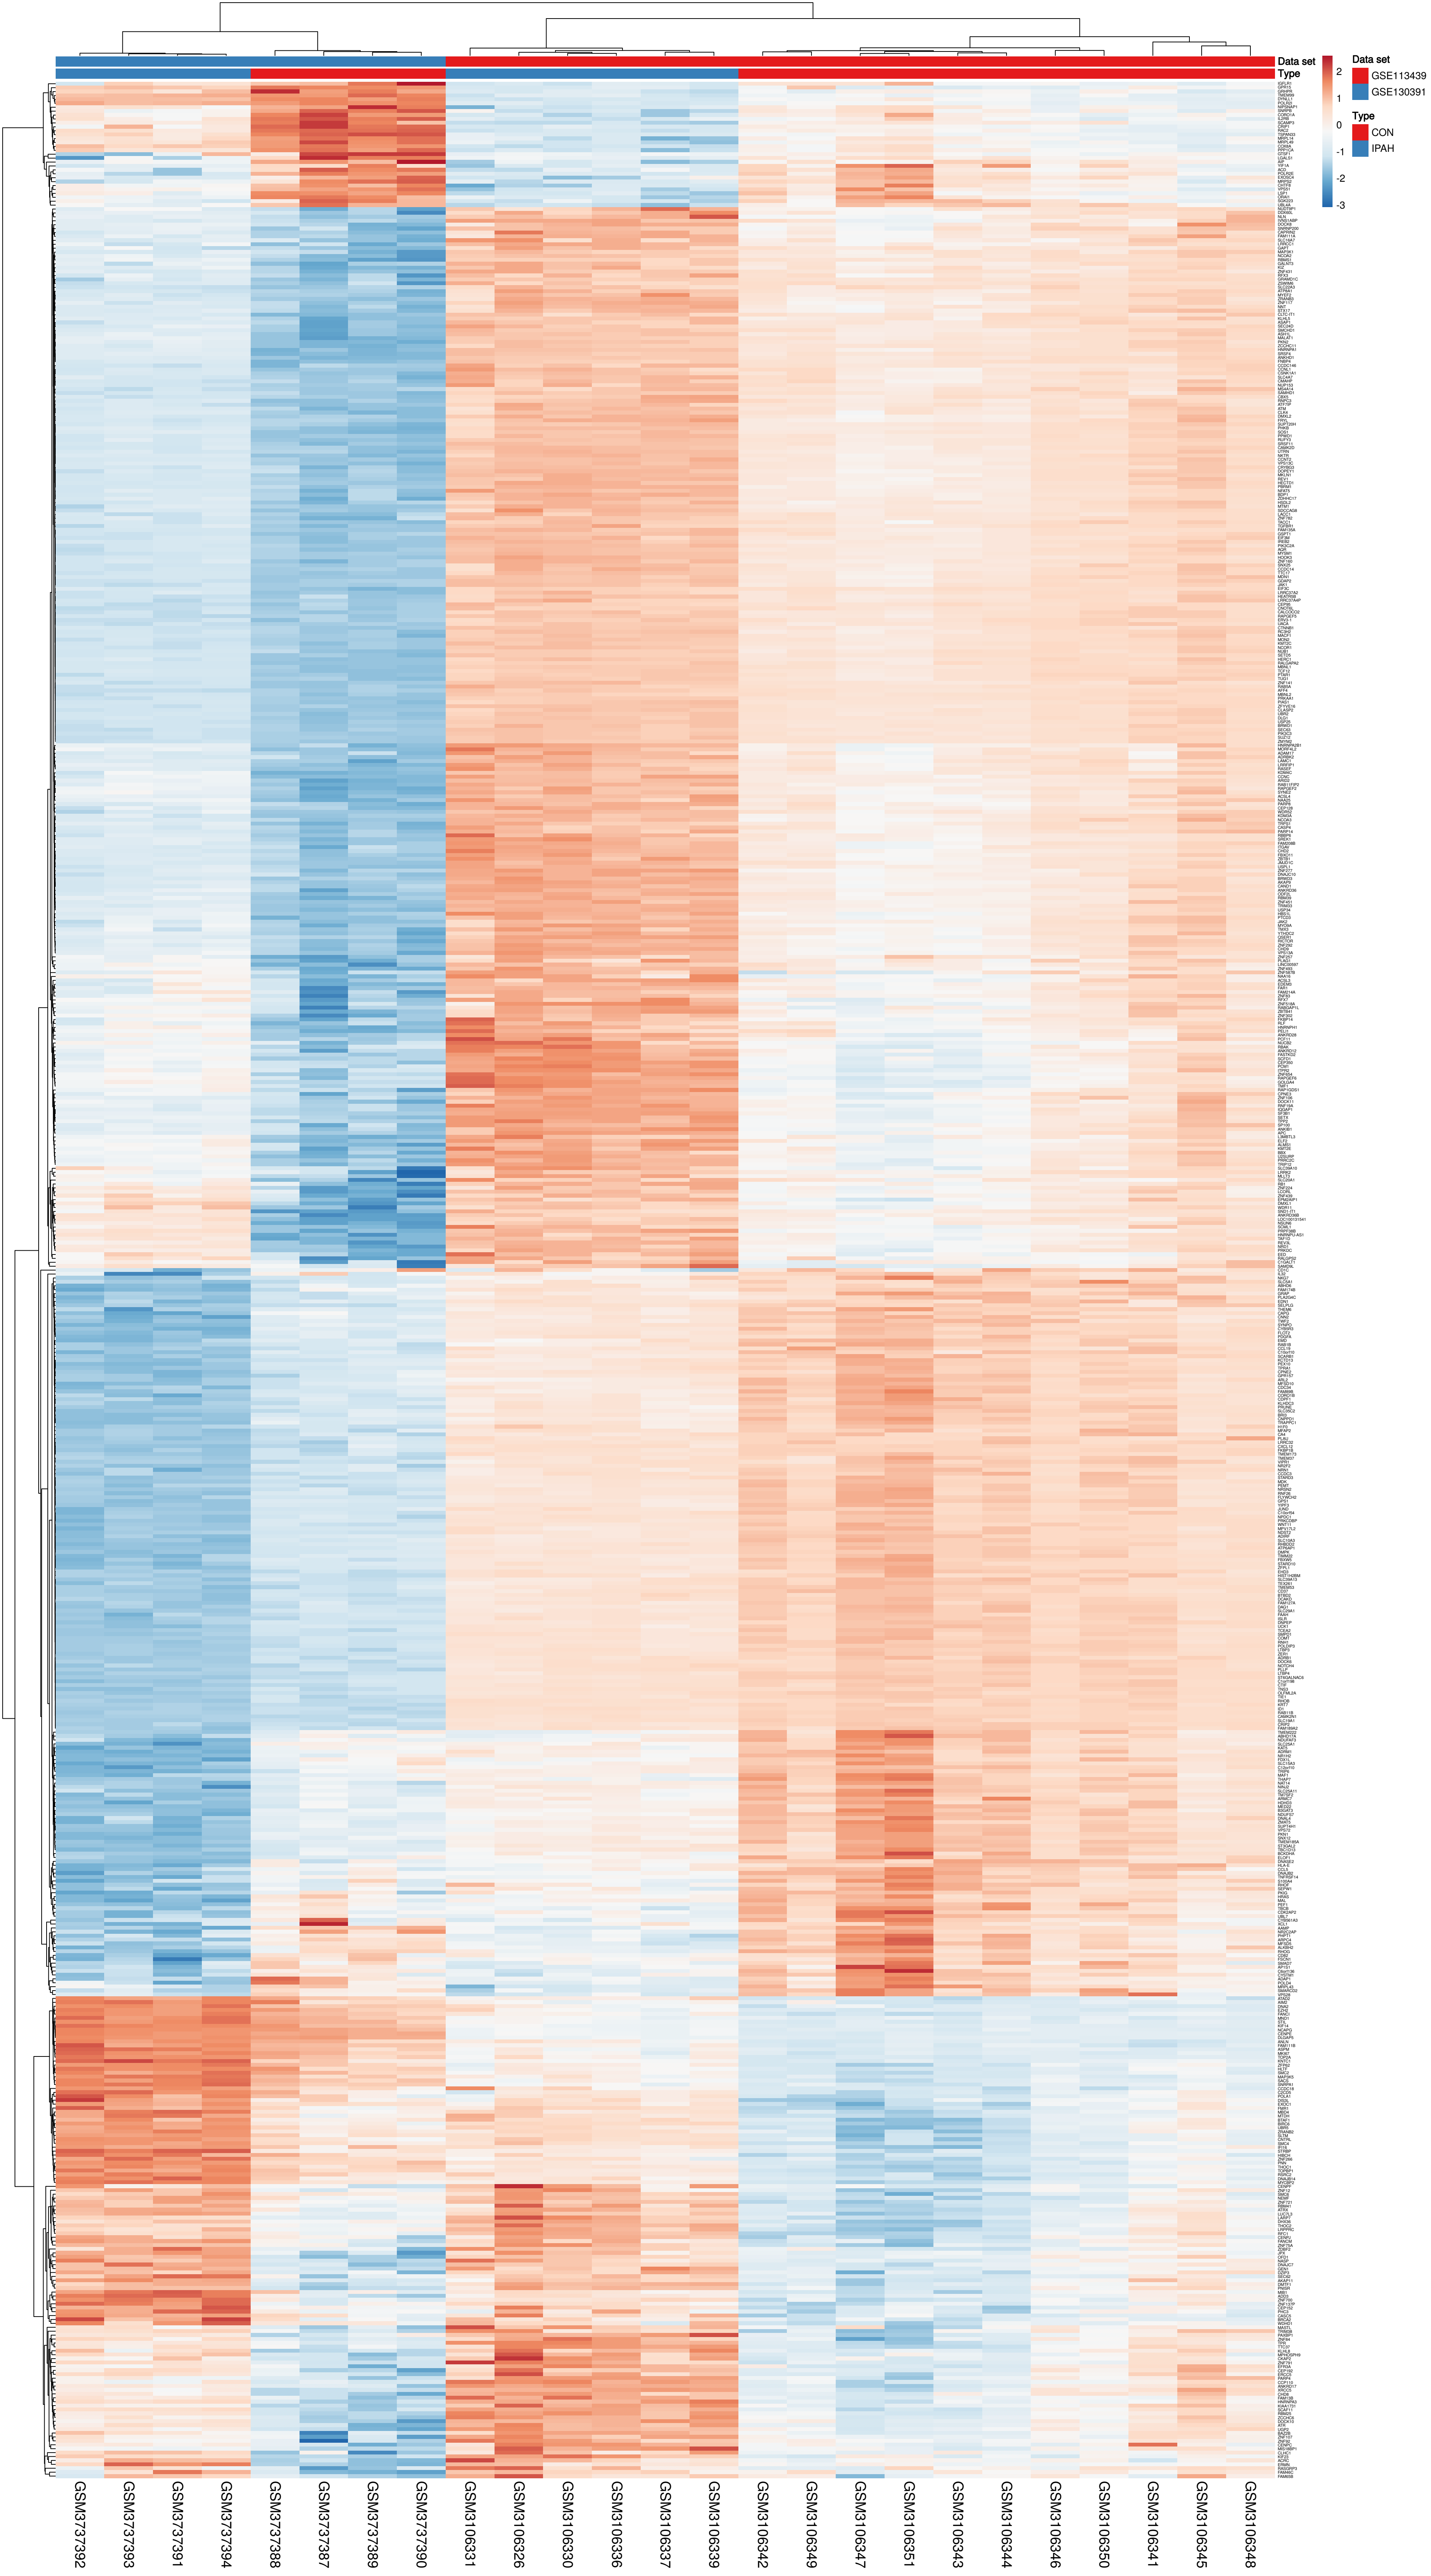

Supplement: s1 [file s1]
